# Supplementary material for: Effects of oxidized rice bran protein induced by rancidity on the hepatic function in mice
Source: Royal Society of Chemistry journal article supplement (doi:10.1039/d2fo00976e), 2022-01-01
Supplement: d2fo00976e1.pdf [file d2fo00976e1.pdf]

## Supplementary Information

### Effects of oxidized rice bran protein induced by rancidity on the hepatic function in mice

Fang Li<sup>a,b</sup>, Xiaojuan Wu<sup>a,b</sup>, Wei Wu<sup>a,b</sup> \*

<sup>a</sup> *College of Food Science and Engineering, Central South University of Forestry and  
Technology, 498 Southern Shaoshan Road, Changsha, Hunan 410004, P. R. China*

<sup>b</sup> *National Engineering Research Center of Rice and Byproduct Deep Processing, 498 South  
Shaoshan Road, Changsha, Hunan 410004, P. R. China*

**Table S1** Ingredient composition and nutritional content of diet

---

| Composition               |      |
|---------------------------|------|
| Total energy Kcal/kg      | 3500 |
| Protein g/kg              | 225  |
| Fat g/kg                  | 106  |
| Carbohydrates g/kg        | 669  |
| Fiber g/kg                | 50   |
| Mineral mixture g/kg      | 38   |
| Vitamin mixture g/kg      | 8    |
| Methionine + cystine g/kg | 8    |
| Lysine g/kg               | 13.9 |
| Choline chloride g/kg     | 1.3  |

---

**Figure S1**

Western blot images for key factors involved in Nrf2/Keap1/ARE and NF- $\kappa$ B in the liver.

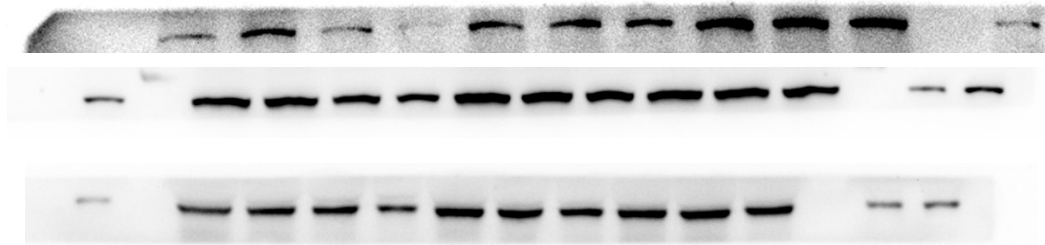

PI3K

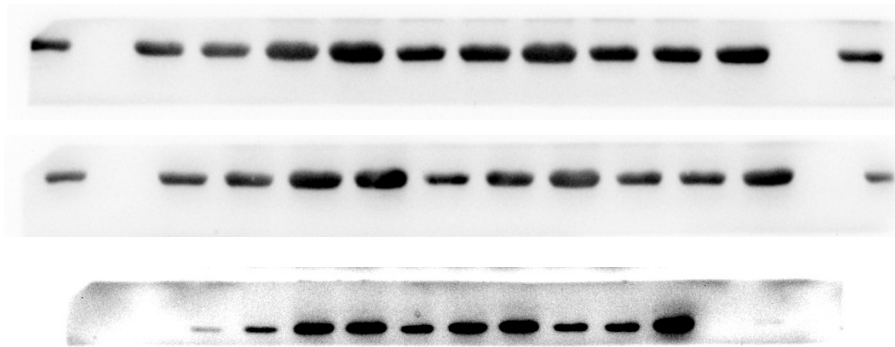

GSK-3 $\beta$

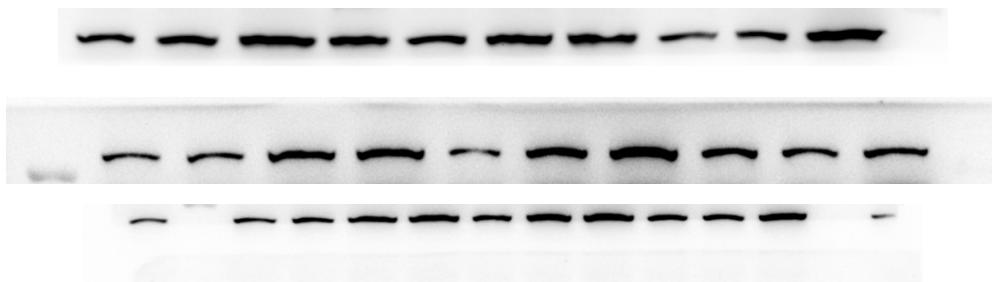

Keap1

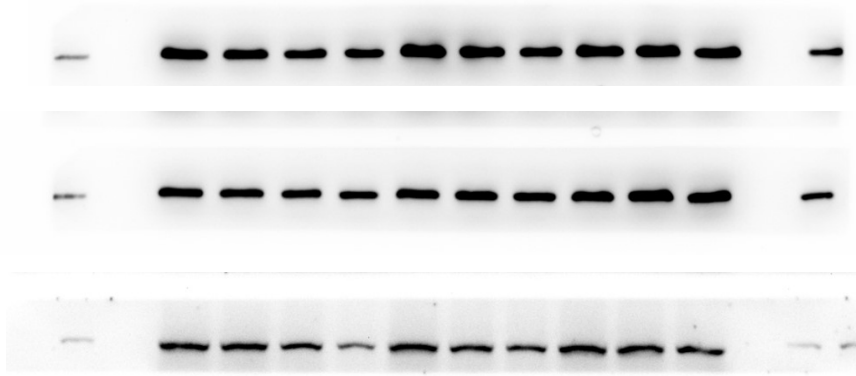

Nrf2

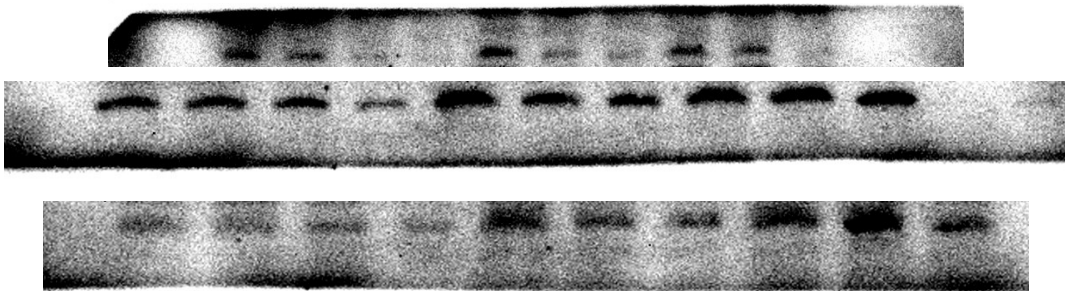

GPX-3

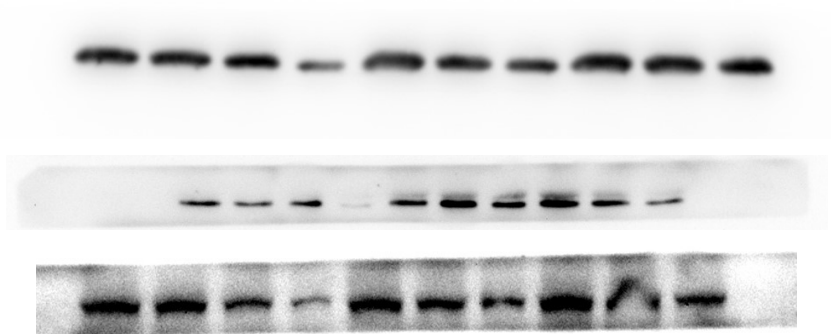

GPX-4

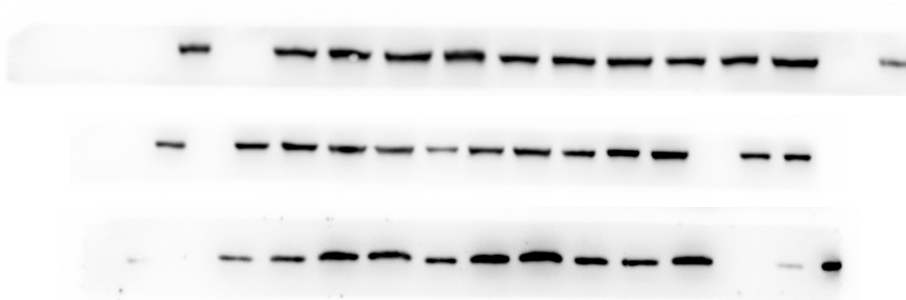

HO-1

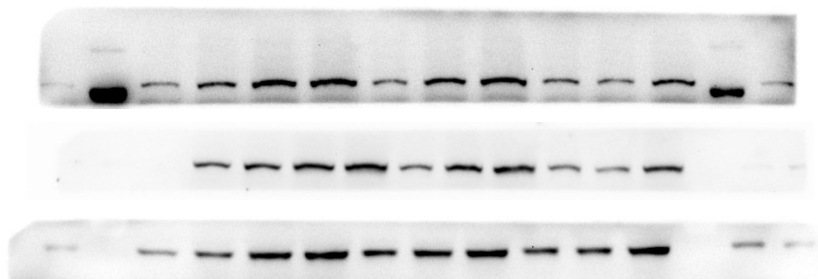

p-p65

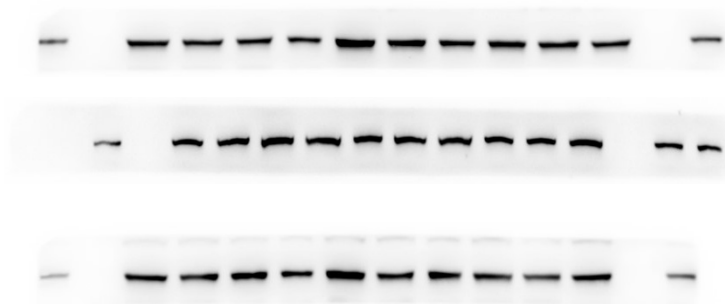

p65

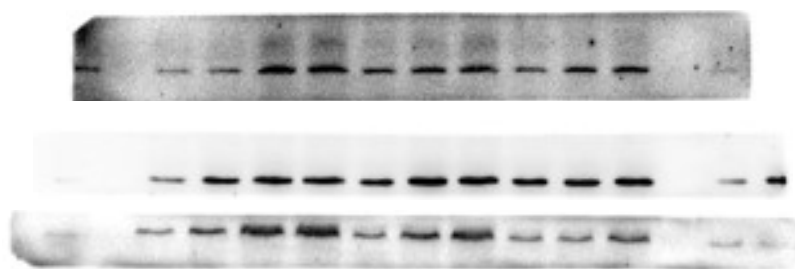

MyD88

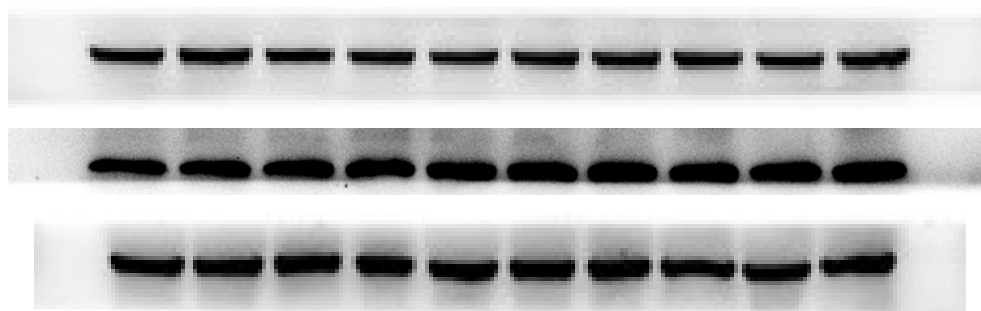

GAPDH
